# Supplementary material for: Association between serum levels of Klotho and inflammatory cytokines in cardiovascular disease: a case-control study
Source: PubMed Central journal article supplement (PMC7053623; doi:10.18632/aging.102734), 2020-01-27
Supplement: aging-12-102734-s001..pdf [file aging-12-102734-s001..pdf]

## SUPPLEMENTARY FIGURE

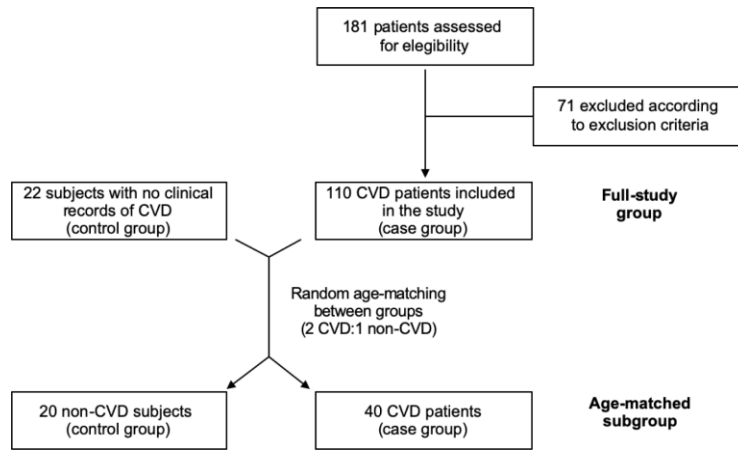

Supplementary Figure 1. Study design.
