# Supplementary material for: Association between serum levels of Klotho and inflammatory cytokines in cardiovascular disease: a case-control study
Source: publisher site journal article supplement (doi:10.18632/aging.102734), 2020-01-27
Supplement: Supplementary file [file aging-v12i2-102734-supplementary-material-SD2.pdf]

## SUPPLEMENTARY TABLE

**Supplemental Table 1. Clinical and laboratory data in the age-matched subgroups.**

| Variable                          | CVD (n=40)          | Non-CVD (n=20)     | P-value |
|-----------------------------------|---------------------|--------------------|---------|
| Age (years)                       | 63.8±7.7            | 63.7±8.2           | NS      |
| Sex (M/F)                         | 31 / 9              | 10 / 7             | NS      |
| Smoker (%)                        | 78.4                | 58.8               | NS      |
| Alcoholism (%)                    | 56.8                | 29.4               | 0.08    |
| BMI (kg/m <sup>2</sup> )          | 28.0±4.0            | 28.7±3.2           | NS      |
| Co-morbidities                    |                     |                    |         |
| HT (%)                            | 78.4                | 70.6               | NS      |
| DM (%)                            | 48.6                | 35.3               | NS      |
| CVD                               |                     |                    |         |
| PAD (%)                           | 56.8                | 0                  | <0.0001 |
| TIA (%)                           | 40.5                | 0                  | <0.01   |
| AAA (%)                           | 10.8                | 0                  | NS      |
| Pharmacological treatment         |                     |                    |         |
| Antiaggregants (%)                | 91.9                | 23.5               | <0.0001 |
| Beta-blockers (%)                 | 24.3                | 11.8               | NS      |
| ACEI/ARA2 (%)                     | 48.6                | 29.4               | NS      |
| CCB (%)                           | 21.6                | 17.6               | NS      |
| Statins (%)                       | 89.2                | 5.9                | <0.0001 |
| Laboratory data                   |                     |                    |         |
| eGFR (mL/min/1.73m <sup>2</sup> ) | 93.4±13.4           | 99.5±15.7          | 0.16    |
| Creatinine (mg/dL)                | 0.80±0.2            | 0.77±0.1           | NS      |
| Albumin (g/dL)                    | 3.9±0.6             | 4.1±0.6            | NS      |
| Calcium (mg/dL)                   | 9.2±0.3             | 9.5±0.5            | <0.05   |
| Phosphorus (mg/dL)                | 3.6±0.5             | 3.5±0.9            | NS      |
| Uric acid (mg/dL)                 | 5.9±1.3             | 5.8±1.3            | NS      |
| Glucose (mg/dL)                   | 124.7±35.7          | 114.2±31.3         | NS      |
| Total cholesterol (mg/dL)         | 170.2±56.3          | 200.5±45.8         | 0.07    |
| HDL (mg/dL)                       | 43.1±14.6           | 49.4±15.4          | 0.17    |
| NLR                               | 3.8±1.9             | 2.8±1.5            | 0.10    |
| CRP (mg/dL)                       | 5.1±4.7             | 1.5±0.7            | <0.01   |
| Klotho (pg/mL)                    | 534.8 (435.2-736.5) | 905.1 (553.0-1733) | <0.05   |
| TNFα (pg/mL)                      | 1.10 (0.85-1.45)    | 1.48 (0.88-2.0)    | NS      |
| IL10 (pg/mL)                      | 4.16 (0.70-8.06)    | 10.89 (4.42-25.47) | <0.05   |
| TNFα/IL10                         | 0.29 (0.13-1.69)    | 0.11 (0.06-0.46)   | <0.05   |

BMI, body mass index; HT, hypertension; DM, diabetes mellitus; PAD, peripheral artery disease; TIA, transient ischemic attack; AAA, abdominal aortic aneurysm; ACEI/ARA2, angiotensin converting enzyme inhibitor/angiotensin receptor antagonist 2; CCB, calcium channels blockers; eGFR, estimated glomerular filtration rate; HDL, high-density lipoprotein; NLR, neutrophil-to-lymphocyte ratio; CRP, c-reactive protein; TNFα, tumor necrosis factor- α; IL10, interleukin 10; NS, not significant.
